# Supplementary material for: Tide-Surge Interaction near Singapore and Malaysia using a Semi-empirical Model
Source: Copernicus journal article supplement (doi:10.5194/egusphere-2024-294), 2024-02-13
Supplement: Supplementary file 1 [file egusphere-2024-294-supplement.pdf]

1 Supplementary figures for

2 “*Tide-Surge Interaction near Singapore and Malaysia using a Semi-*  
3 *empirical Model*”

4 Zhi Yang Koh<sup>1</sup>, Benjamin S. Grandey<sup>1</sup>, Dhrubajyoti Samanta<sup>2</sup>, Adam D. Switzer<sup>2,3</sup>, Benjamin P.  
5 Horton<sup>2,3</sup>, Justin Dauwels<sup>4</sup>, Lock Yue Chew<sup>1</sup>

6 <sup>1</sup>School of Physical and Mathematical Sciences, Nanyang Technological University, Singapore

7 <sup>2</sup>Earth Observatory of Singapore, Nanyang Technological University, Singapore

8 <sup>3</sup>Asian School of the Environment, Nanyang Technological University, Singapore

9 <sup>4</sup>Department of Microelectronics, Faculty of Electrical Engineering, Mathematics, and Computer Science, Delft University of  
10 Technology (TU Delft), The Netherlands

11 *Correspondence to:* Zhi Yang Koh (kohz0034@e.ntu.edu.sg)

12

## Distribution of tidal cycle duration

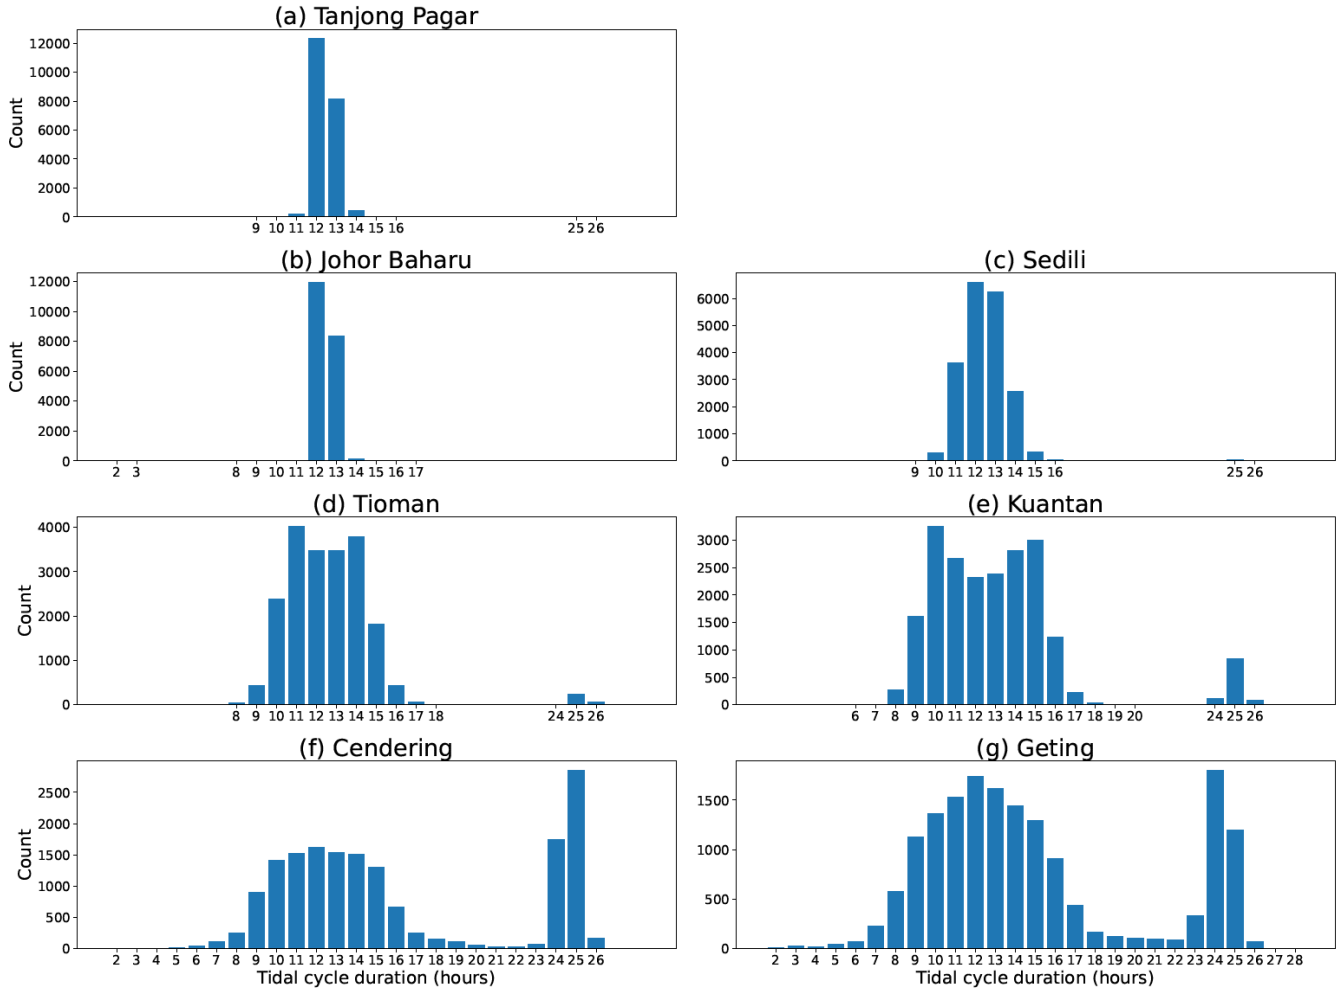

13

14 **Figure S1: Histogram of the duration of tidal cycles at each tide gauge location. Tidal cycles are defined as the duration from one**  
 15 **local minima in the hourly tidal level to the observation immediately preceding the next local minima (Sect. 2.2). Tidal cycles at**  
 16 **Tanjung Pagar and Johor Baharu are often 12–13 hours long, while the tidal cycles at the other locations are less consistent.**

17

$R_{gauge} - R_{wind}$  scatter plot

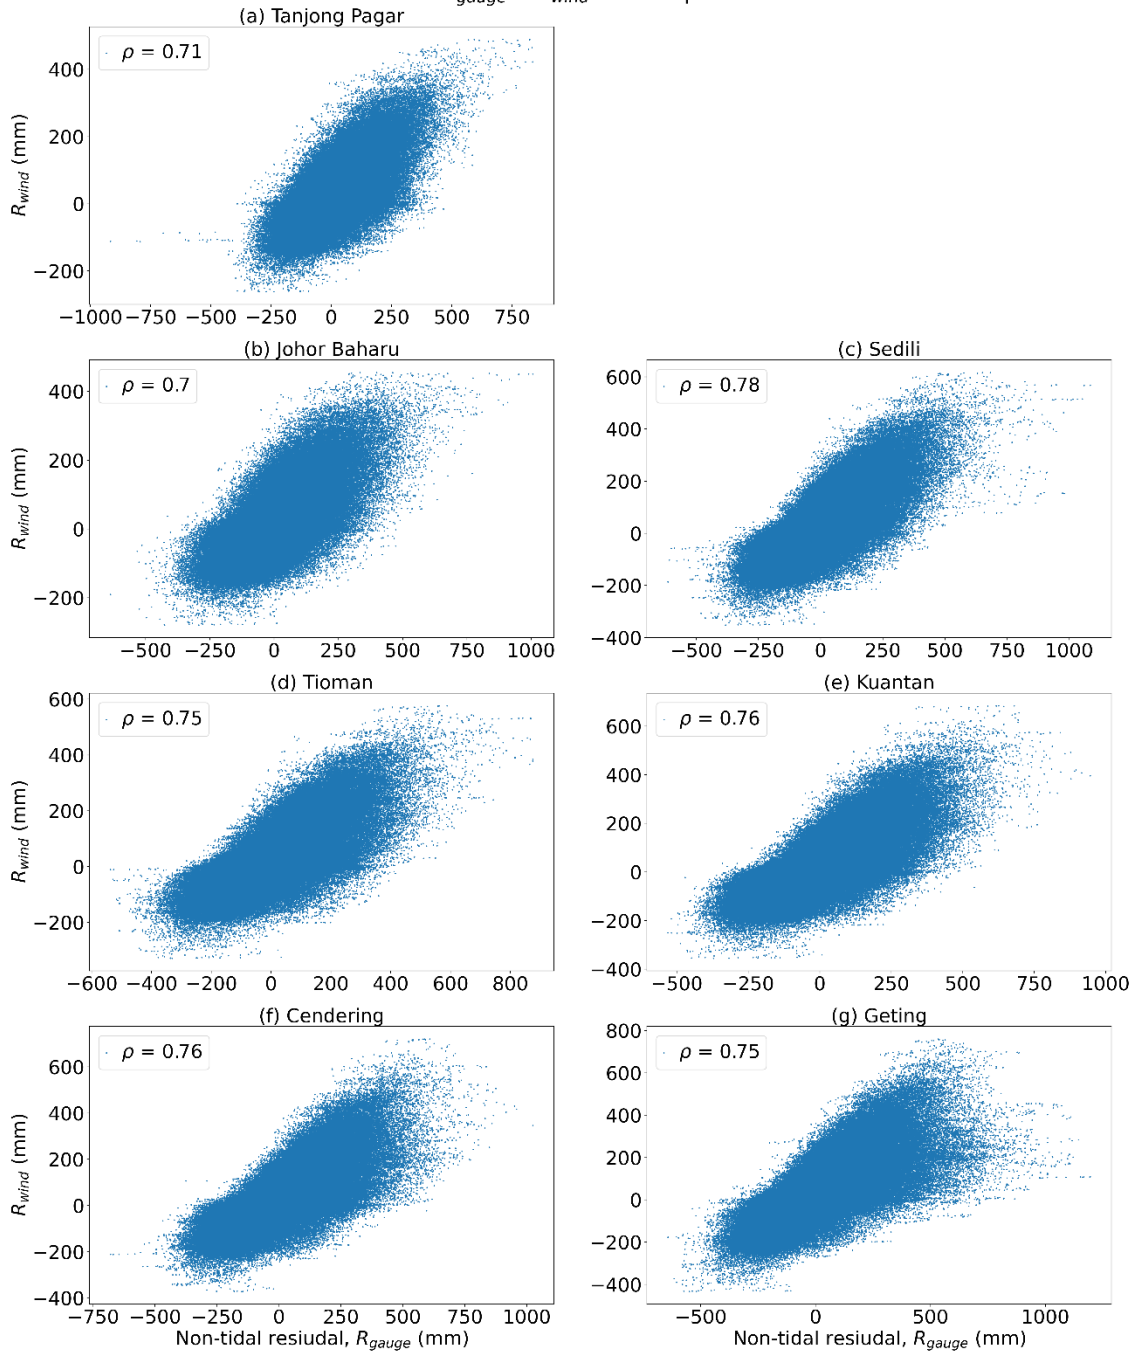

18

19 **Figure S2: Scatter plots between non-tidal residuals,  $R_{gauge}$  and  $R_{wind}$  at each tide-gauge location. The correlation coefficients of**  
20 **0.7–0.8 corresponds to a coefficient of determination of 0.5–0.6.**

21

Distribution of bootstrap sample log-probability

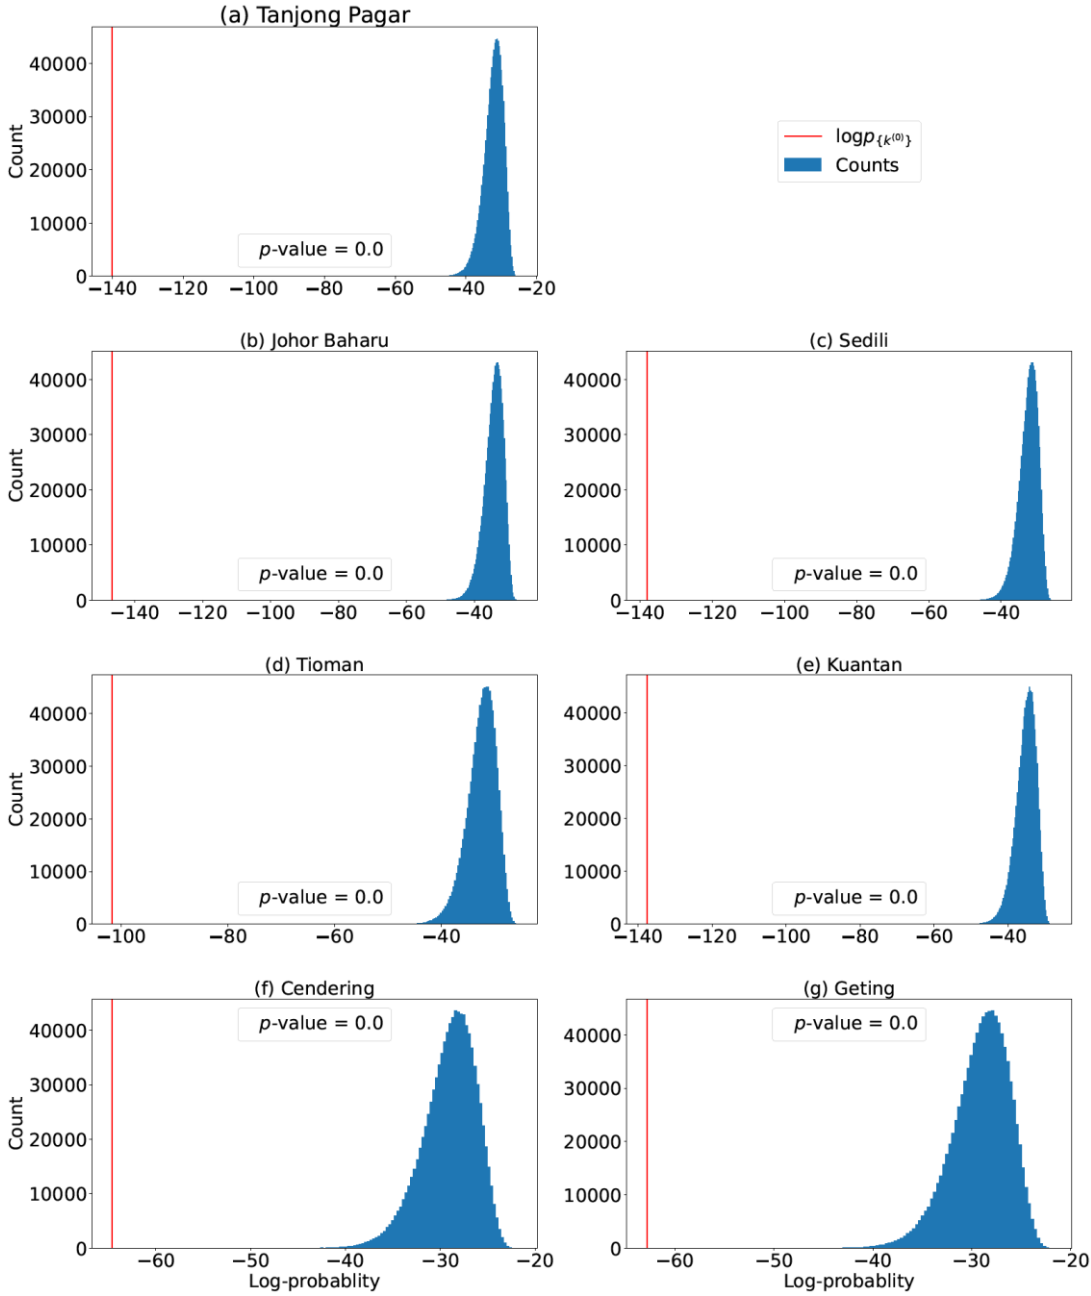

22

23 **Figure S3: Histogram of 1,000,000 log-probabilities of obtaining a randomly generated bootstrap sample from the normalized No-**  
 24 **TSI distribution  $p_h$  of  $R_{\text{gauge}}$  during semidiurnal tidal cycles. Red vertical lines indicate  $\log p_{\{k^{(0)}\}}$ , the log-probabilities of obtaining**  
 25 **the frequency distribution  $k^{(0)}$  from  $p_h$ .  $p$ -values are obtained by taking the quantile of the  $\log p_{\{k^{(0)}\}}$  within the 1,000,000 log-**  
 26 **probabilities of bootstrap samples.**

27

Number of extremes found at x hours from nearest tidal high water

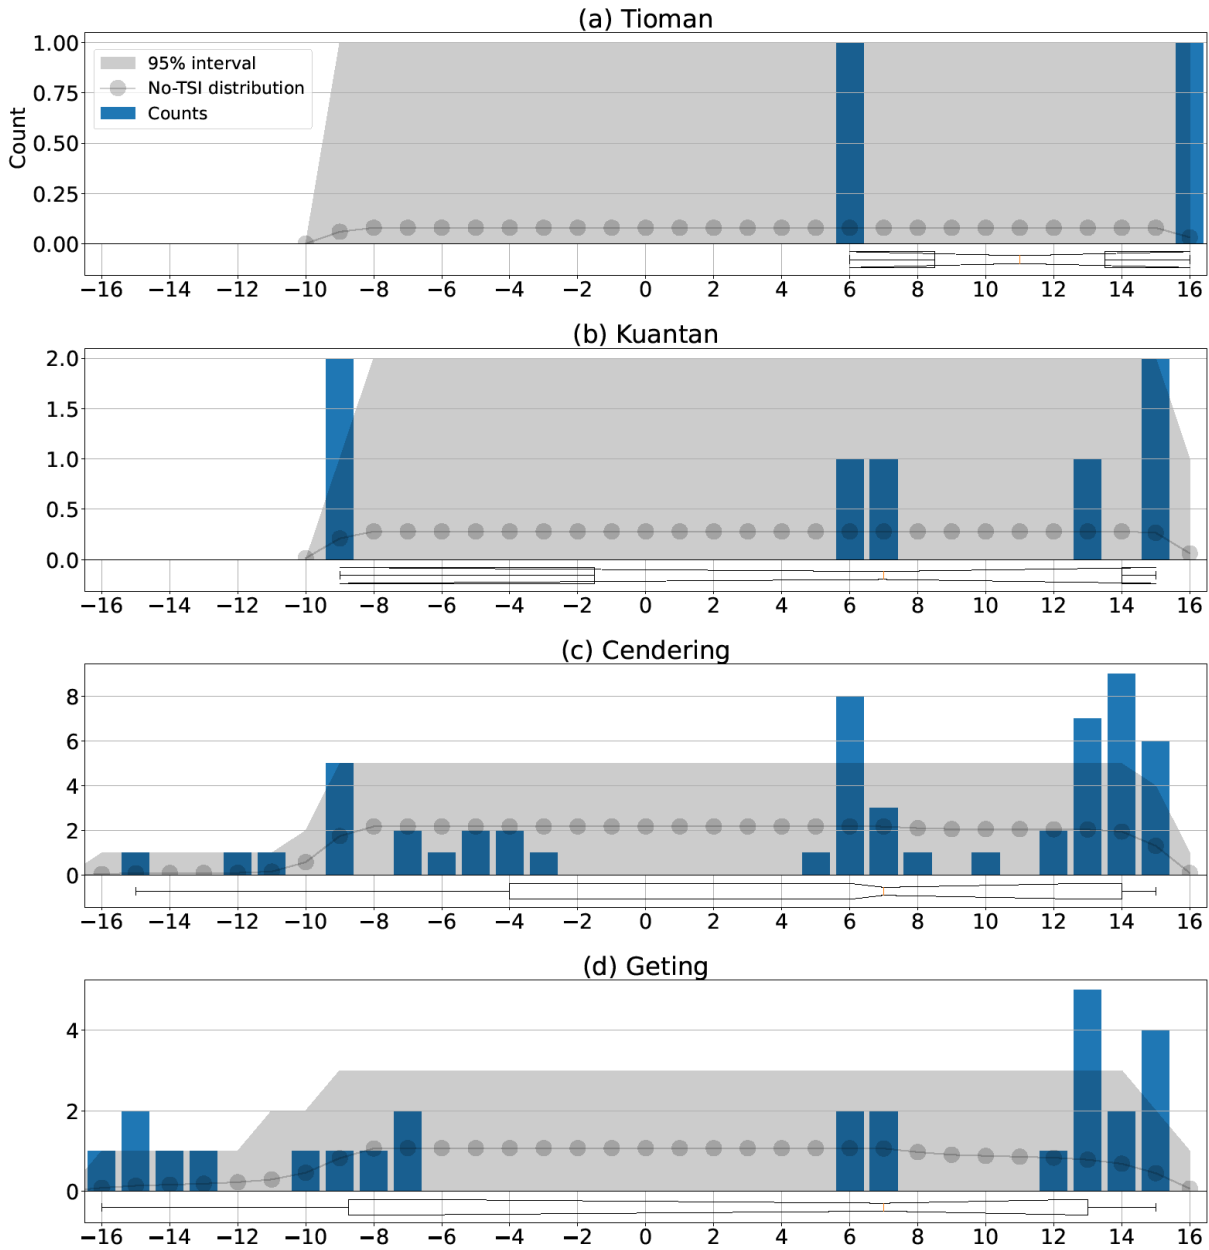

28

29 **Figure S4:** The frequency distribution for extreme values of  $R_{\text{gauge}}$  and the No-TSI distribution during diurnal tidal cycles,  
 30 truncated at  $\pm 16$  hours from tidal high water. The frequency distribution is compared to the No-TSI distribution to determine the  
 31 presence of tide-surge interaction. Summary statistics of the frequency distribution are shown using the horizontal notched box plot,  
 32 where orange lines indicate the medians, notches indicate the 95% confidence interval of the medians, notched rectangles indicate  
 33 the interquartile range (IQR), whiskers indicate a range that extends up to  $1.5 \times \text{IQR}$  from the limits of the IQR, and black circles (if  
 34 present) indicate outliers outside this range.

35

### Distribution of bootstrap sample log-probability

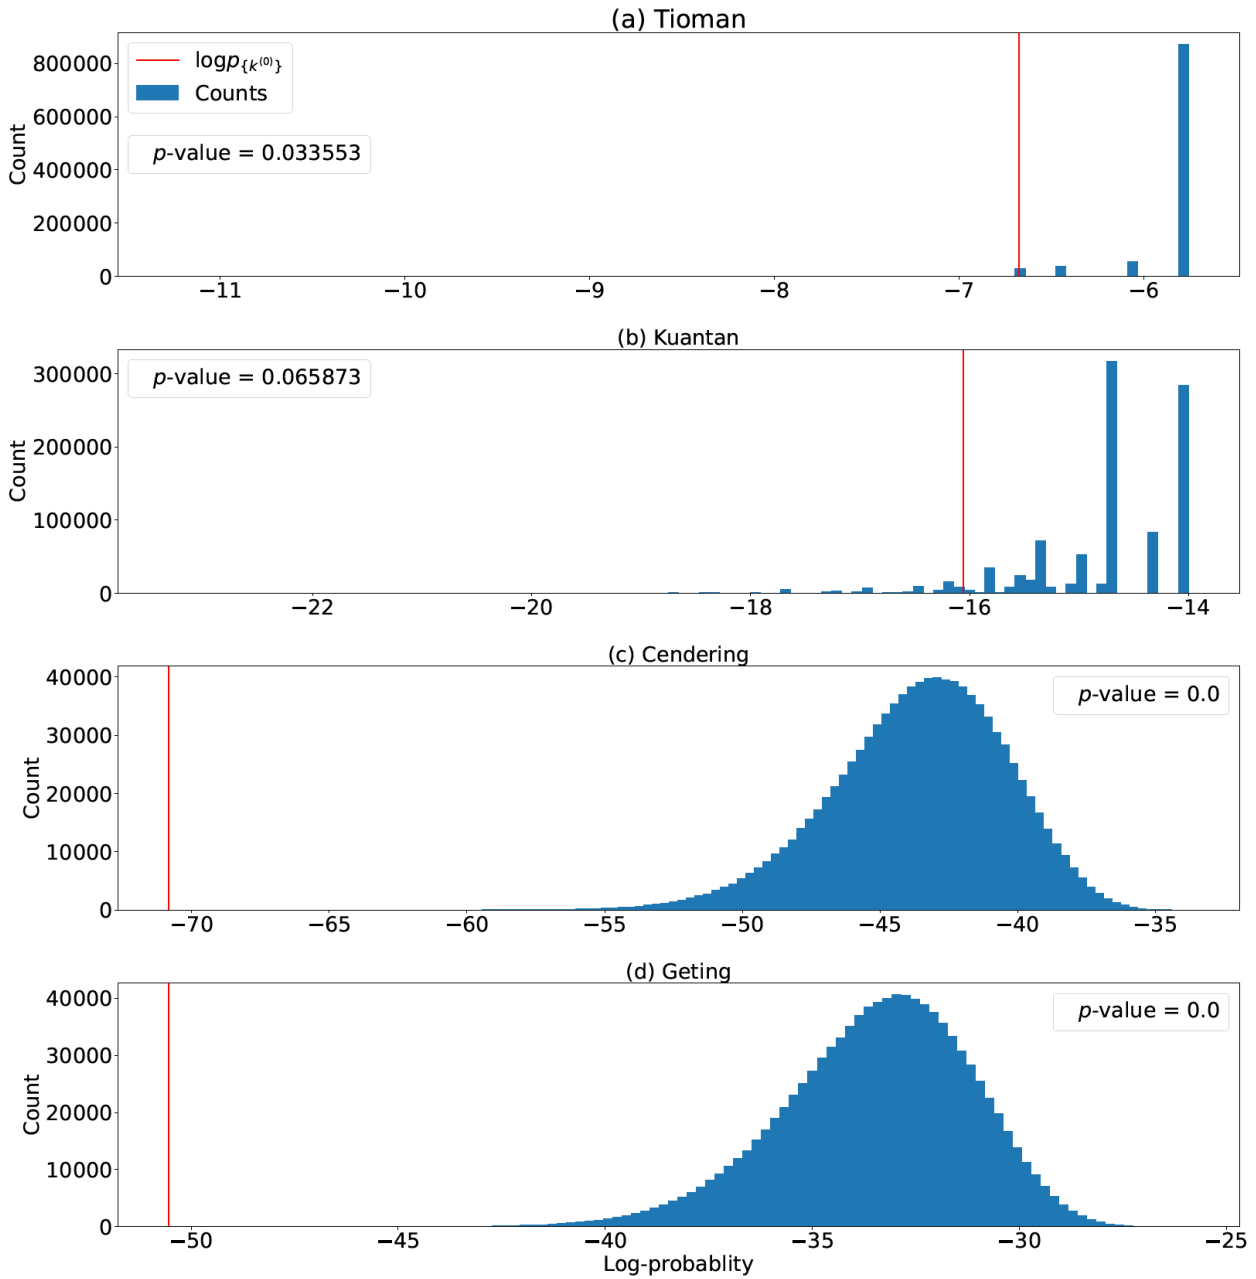

36

37 **Figure S5: Histogram of 1,000,000 log-probabilities of obtaining a randomly generated bootstrap sample from the normalized No-**  
 38 **TSI distribution  $p_h$  of  $R_{\text{gauge}}$  during diurnal tidal cycles. Red vertical lines indicate  $\log p_{\{k^{(0)}\}}$ , the log-probabilities of obtaining the**  
 39 **frequency distribution  $k^{(0)}$  from  $p_h$ .  $p$ -values are obtained by taking the quantile of the  $\log p_{\{k^{(0)}\}}$  within the 1,000,000 log-**  
 40 **probabilities of bootstrap samples.**

41

Number of  $R_{wind}$  extremes found at x hours from nearest tidal high water

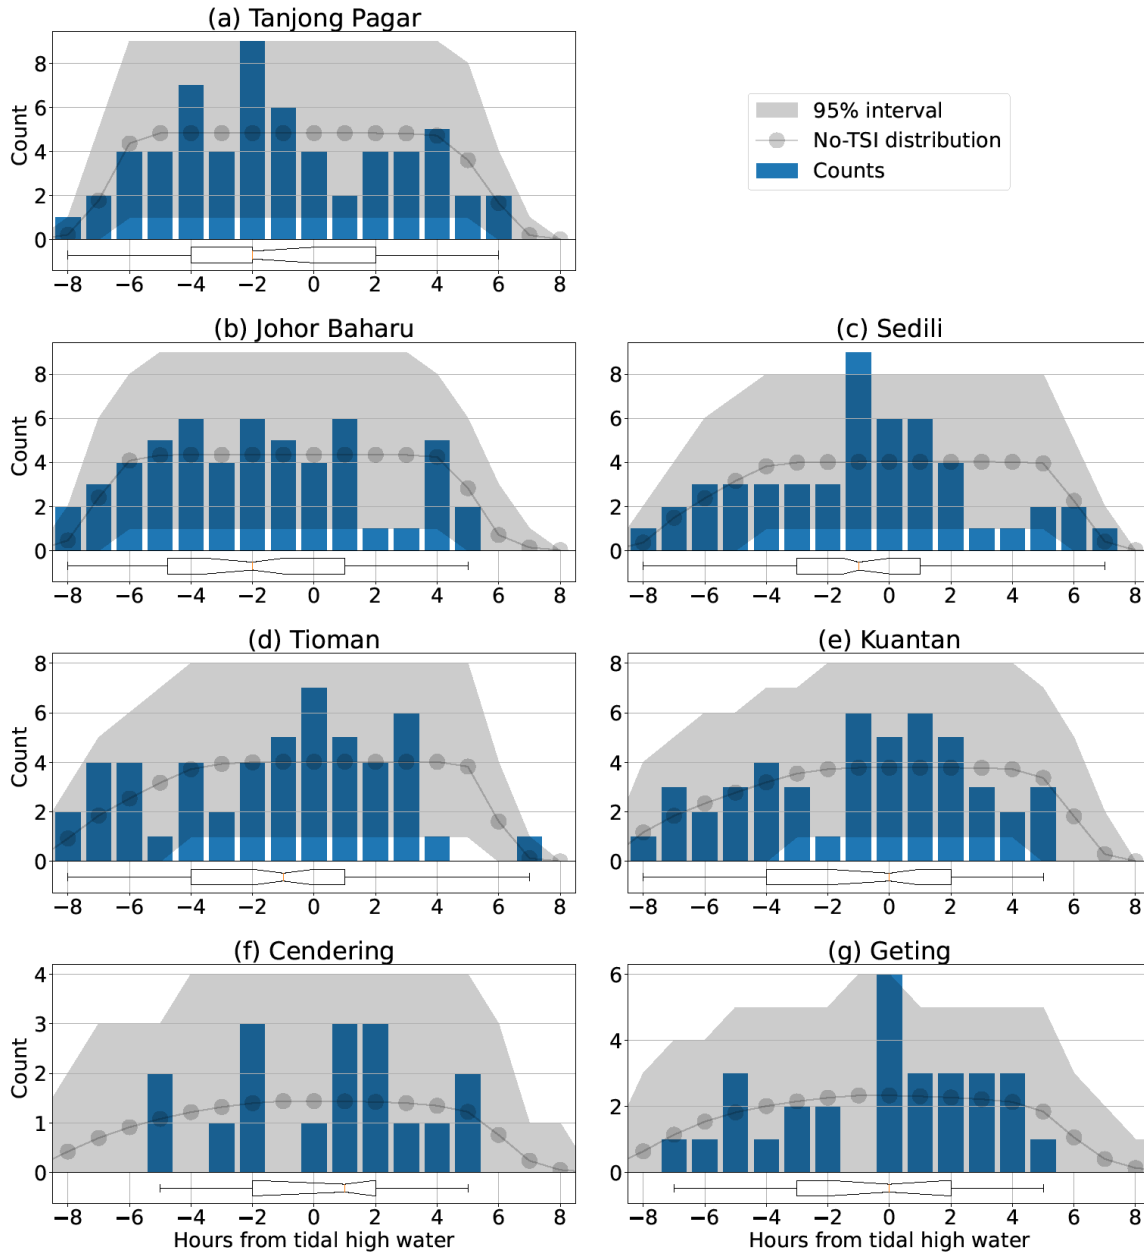

42

43 **Figure S6:** The frequency distribution for extreme values of  $R_{wind}$  and the No-TSI distribution during semidiurnal tidal cycles,  
 44 truncated at  $\pm 8$  hours from tidal high water. The frequency distribution is compared to the No-TSI distribution to determine the  
 45 presence of tide-surge interaction. Summary statistics of the frequency distribution are shown using the horizontal notched box plot,  
 46 where orange lines indicate the medians, notches indicate the 95% confidence interval of the medians, notched rectangles indicate  
 47 the interquartile range (IQR), whiskers indicate a range that extends up to  $1.5 \times \text{IQR}$  from the limits of the IQR, and black circles (if  
 48 present) indicate outliers outside this range.

49

Distribution of bootstrap sample log-probability

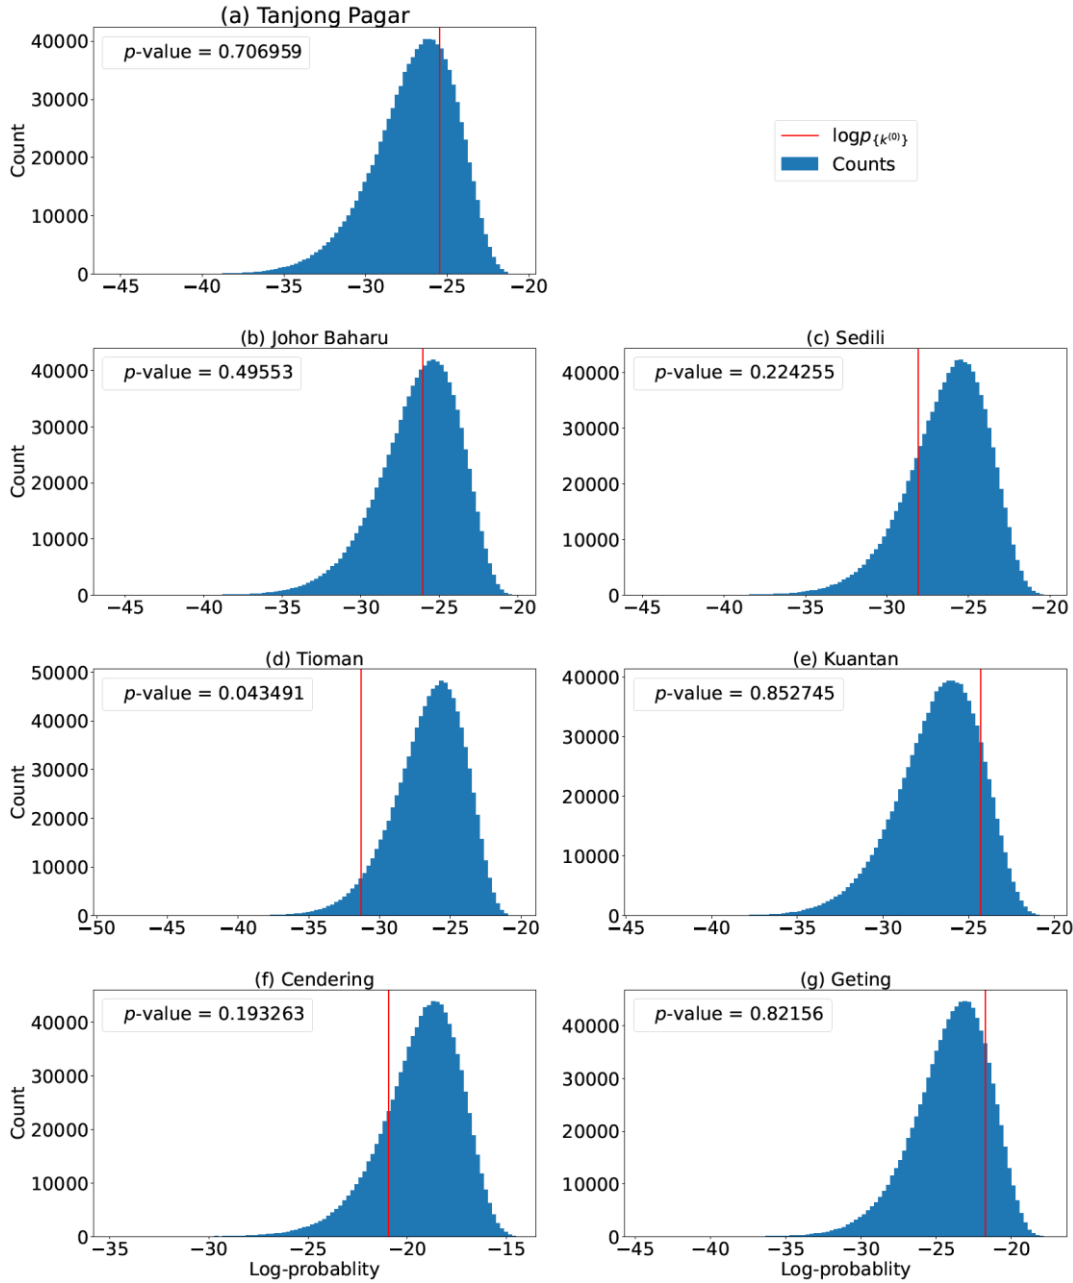

50

51 **Figure S7: Histogram of 1,000,000 log-probabilities of obtaining a randomly generated bootstrap sample from the normalized No-**  
 52 **TSI distribution  $p_h$  of  $R_{\text{wind}}$  during semidiurnal tidal cycles. Red vertical lines indicate  $\log p_{\{k^{(0)}}}$ , the log-probabilities of obtaining**  
 53 **the frequency distribution  $k^{(0)}$  from  $p_h$ .  $p$ -values are obtained by taking the quantile of the  $\log p_{\{k^{(0)}}}$  within the 1,000,000 log-**  
 54 **probabilities of bootstrap samples.**

55



Number of  $R_{wind}$  extremes found at x hours from nearest tidal high water

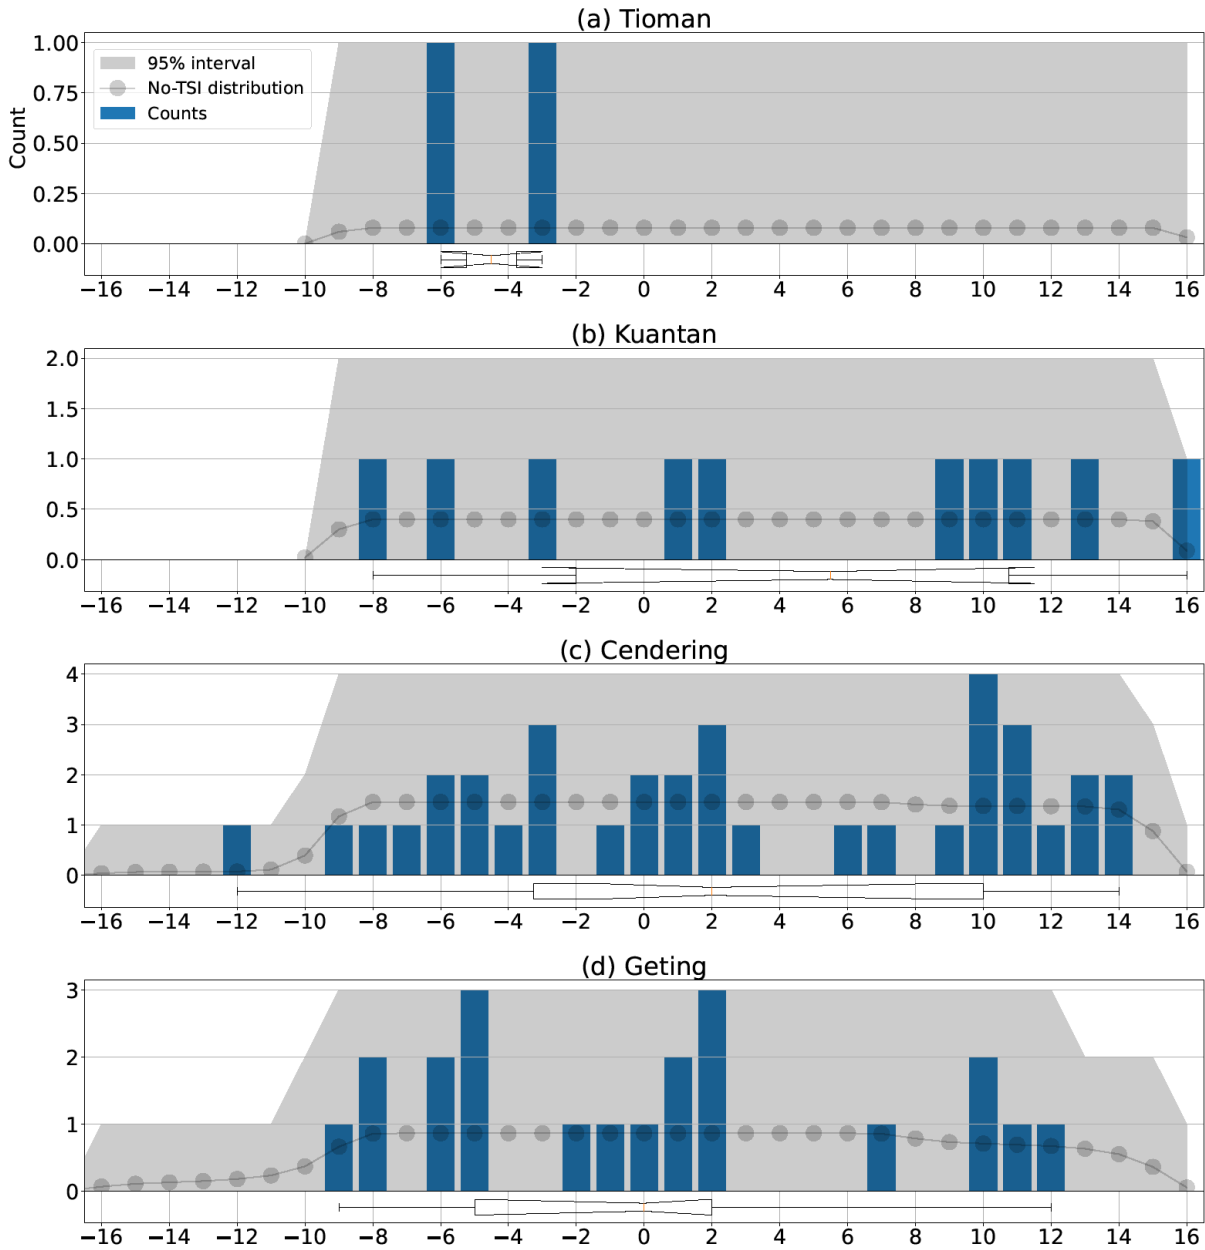

56

57 **Figure S8:** The frequency distribution for extreme values of  $R_{wind}$  and the No-TSI distribution during diurnal tidal cycles, truncated  
 58 at  $\pm 16$  hours from tidal high water. The frequency distribution is compared to the No-TSI distribution to determine the presence  
 59 of tide-surge interaction. Summary statistics of the frequency distribution are shown using the horizontal notched box plot, where  
 60 orange lines indicate the medians, notches indicate the 95% confidence interval of the medians, notched rectangles indicate the  
 61 interquartile range (IQR), whiskers indicate a range that extends up to  $1.5 \times IQR$  from the limits of the IQR, and black circles (if  
 62 present) indicate outliers outside this range.

63

Distribution of bootstrap sample log-probability

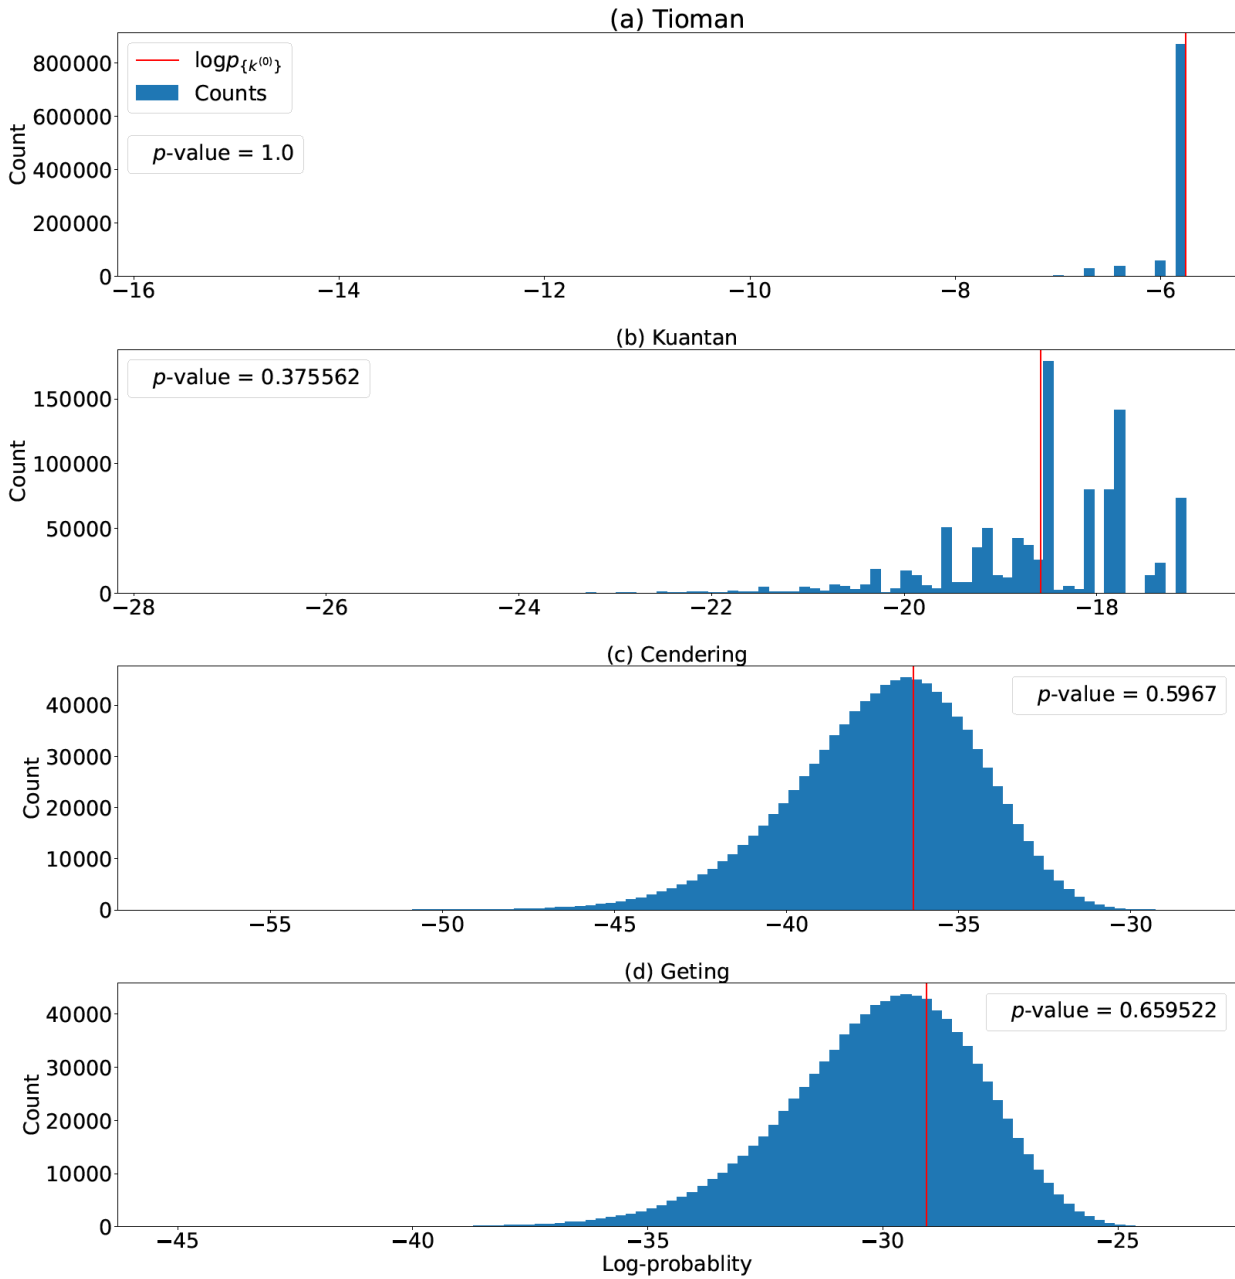

64

65 **Figure S9: Histogram of 1,000,000 log-probabilities of obtaining a randomly generated bootstrap sample from the normalized No-**  
 66 **TSI distribution  $p_h$  of  $R_{wind}$  during diurnal tidal cycles. Red vertical lines indicate  $\log p_{\{k^{(0)}\}}$ , the log-probabilities of obtaining the**  
 67 **frequency distribution  $k^{(0)}$  from  $p_h$ .  $p$ -values are obtained by taking the quantile of the  $\log p_{\{k^{(0)}\}}$  within the 1,000,000 log-**  
 68 **probabilities of bootstrap samples.**

69

Number of  $R_{\text{phase}}$  extremes found at  $x$  hours from nearest tidal high water

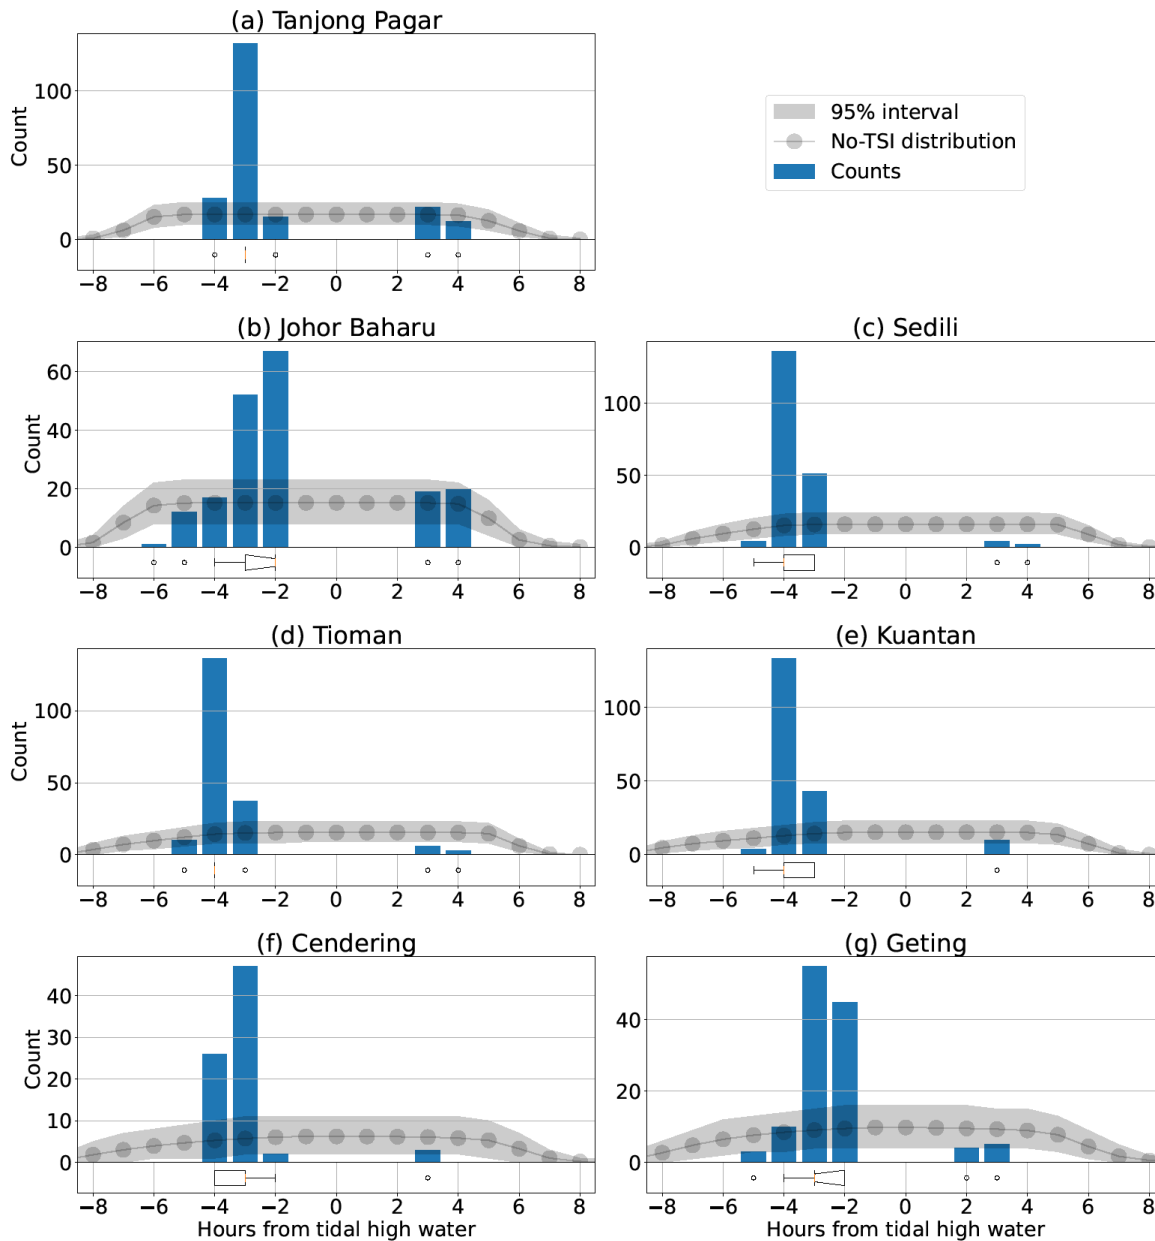

70

71 **Figure S10: The frequency distribution for extreme values of  $R_{\text{phase}}$  and the No-TSI distribution during semidiurnal tidal cycles,**  
 72 **truncated at  $\pm 8$  hours from tidal high water. The frequency distribution is compared to the No-TSI distribution to determine the**  
 73 **presence of tide-surge interaction. Summary statistics of the frequency distribution are shown using the horizontal notched box plot,**  
 74 **where orange lines indicate the medians, notches indicate the 95% confidence interval of the medians, notched rectangles indicate**  
 75 **the interquartile range (IQR), whiskers indicate a range that extends up to  $1.5 \times \text{IQR}$  from the limits of the IQR, and black circles (if**  
 76 **present) indicate outliers outside this range.**

77

Distribution of bootstrap sample log-probability

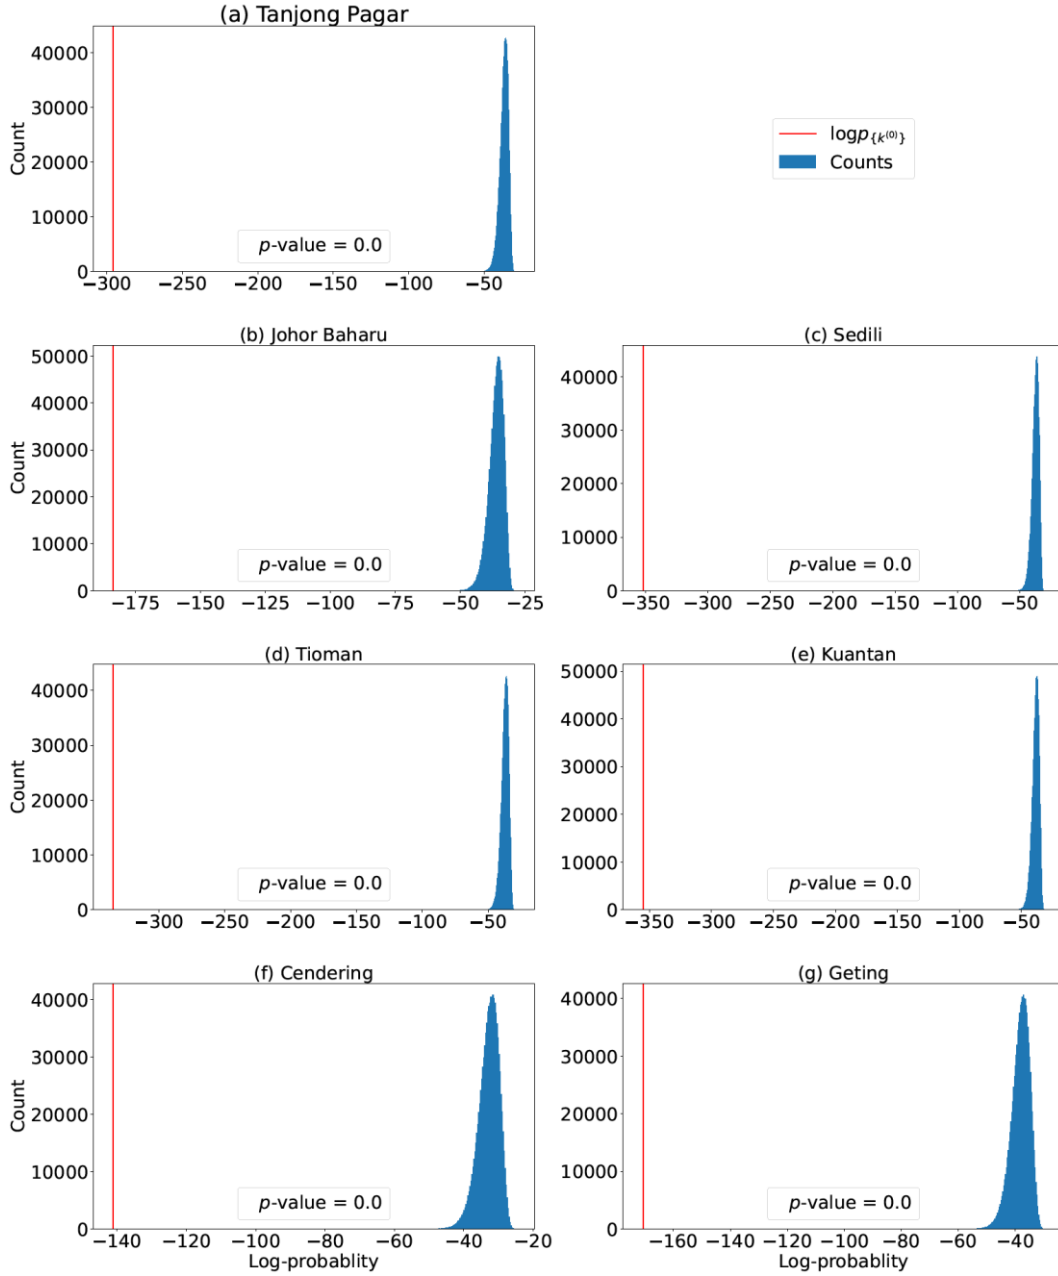

78

79 **Figure S11: Histogram of 1,000,000 log-probabilities of obtaining a randomly generated bootstrap sample from the normalized No-**  
 80 **TSI distribution  $p_h$  of  $R_{\text{phase}}$  during semidiurnal tidal cycles. Red vertical lines indicate  $\log p_{\{k^{(0)}\}}$ , the log-probabilities of obtaining**  
 81 **the frequency distribution  $k^{(0)}$  from  $p_h$ .  $p$ -values are obtained by taking the quantile of the  $\log p_{\{k^{(0)}\}}$  within the 1,000,000 log-**  
 82 **probabilities of bootstrap samples.**

83

Number of  $R_{phase}$  extremes found at x hours from nearest tidal high water

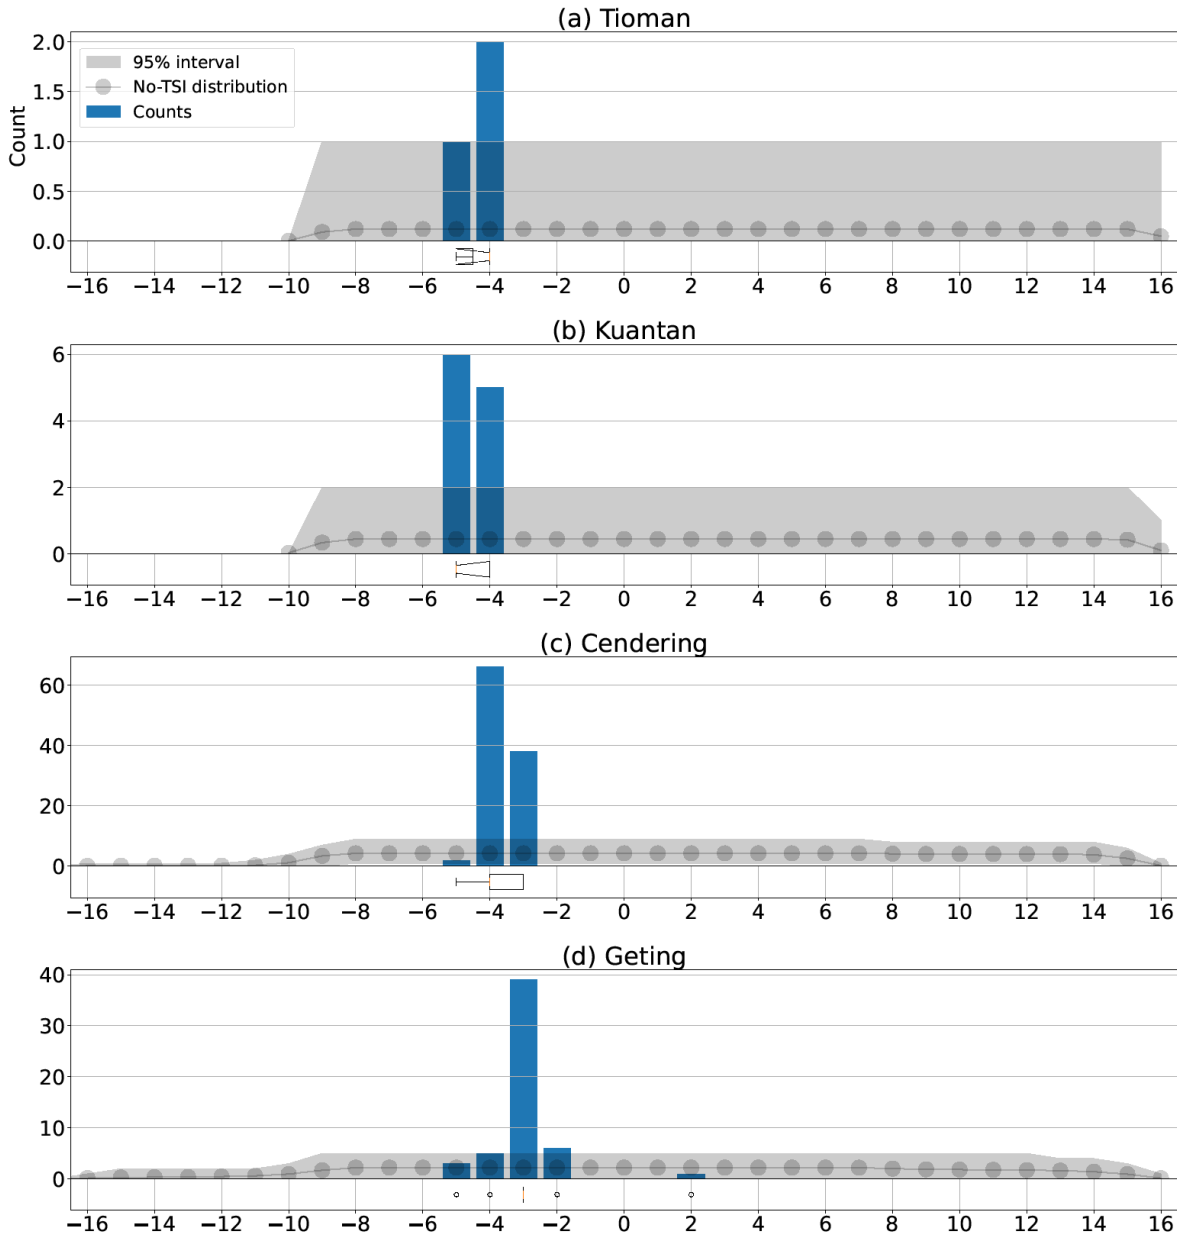

84

85 **Figure S12: The frequency distribution for extreme values of  $R_{phase}$  and the No-TSI distribution during diurnal tidal cycles,**  
 86 **truncated at  $\pm 16$  hours from tidal high water. The frequency distribution is compared to the No-TSI distribution to determine the**  
 87 **presence of tide-surge interaction. Summary statistics of the frequency distribution are shown using the horizontal notched box plot,**  
 88 **where orange lines indicate the medians, notches indicate the 95% confidence interval of the medians, notched rectangles indicate**  
 89 **the interquartile range (IQR), whiskers indicate a range that extends up to  $1.5 \times IQR$  from the limits of the IQR, and black circles (if**  
 90 **present) indicate outliers outside this range.**

91

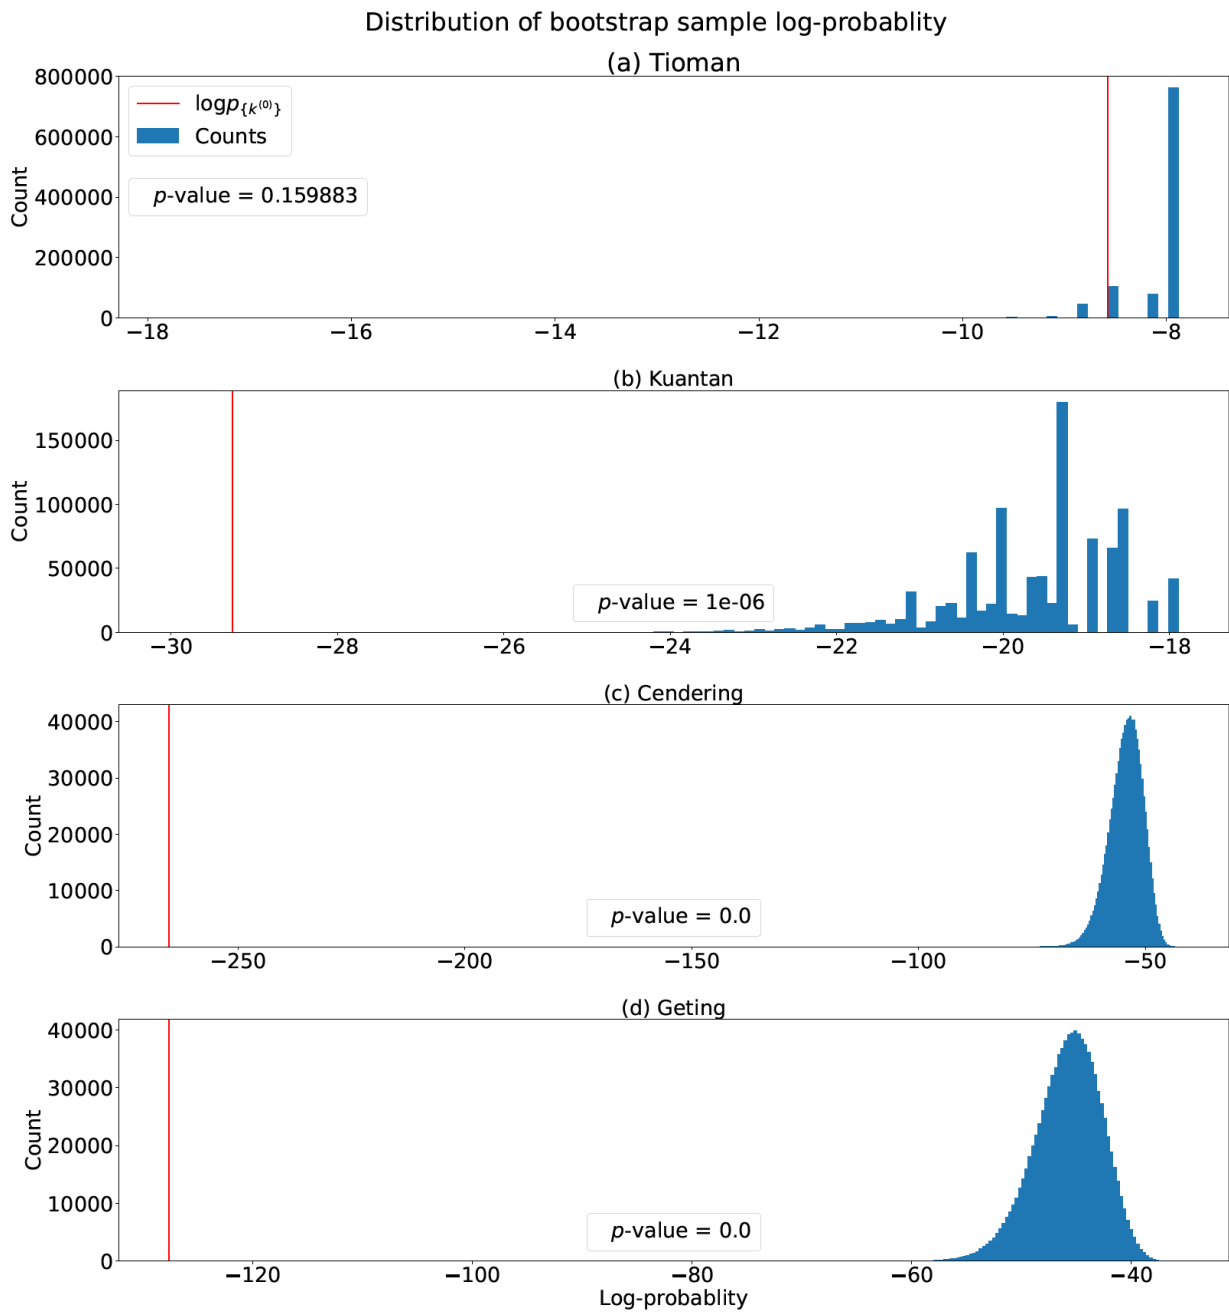

92

93 **Figure S13: Histogram of 1,000,000 log-probabilities of obtaining a randomly generated bootstrap sample from the normalized No-**  
 94 **TSI distribution  $p_h$  of  $R_{\text{phase}}$  during diurnal tidal cycles. Red vertical lines indicate  $\log p_{\{k^{(0)}\}}$ , the log-probabilities of obtaining the**  
 95 **frequency distribution  $k^{(0)}$  from  $p_h$ .  $p$ -values are obtained by taking the quantile of the  $\log p_{\{k^{(0)}\}}$  within the 1,000,000 log-**  
 96 **probabilities of bootstrap samples.**

97

Illustration of why  $R_{phase}$  is largest at 3 and 4 hours from tidal high water

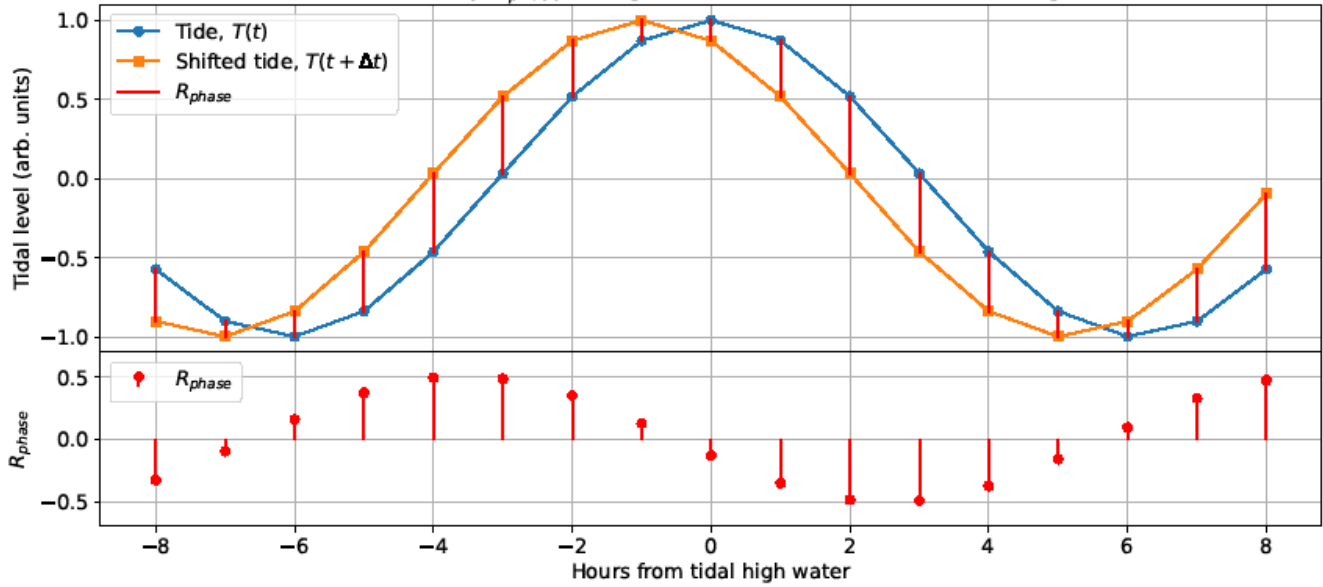

98

99 **Figure S14: The greatest vertical difference between two identical but slightly horizontally-displaced functions are near where the**  
100 **function has the steepest gradient. For semidiurnal tides, this corresponds to 3–4 hours from HW. Magnitude of the horizontal**  
101 **displacement is an arbitrary amount and exaggerated for the purpose of illustration.**

102

Distribution of bootstrap sample log-probability

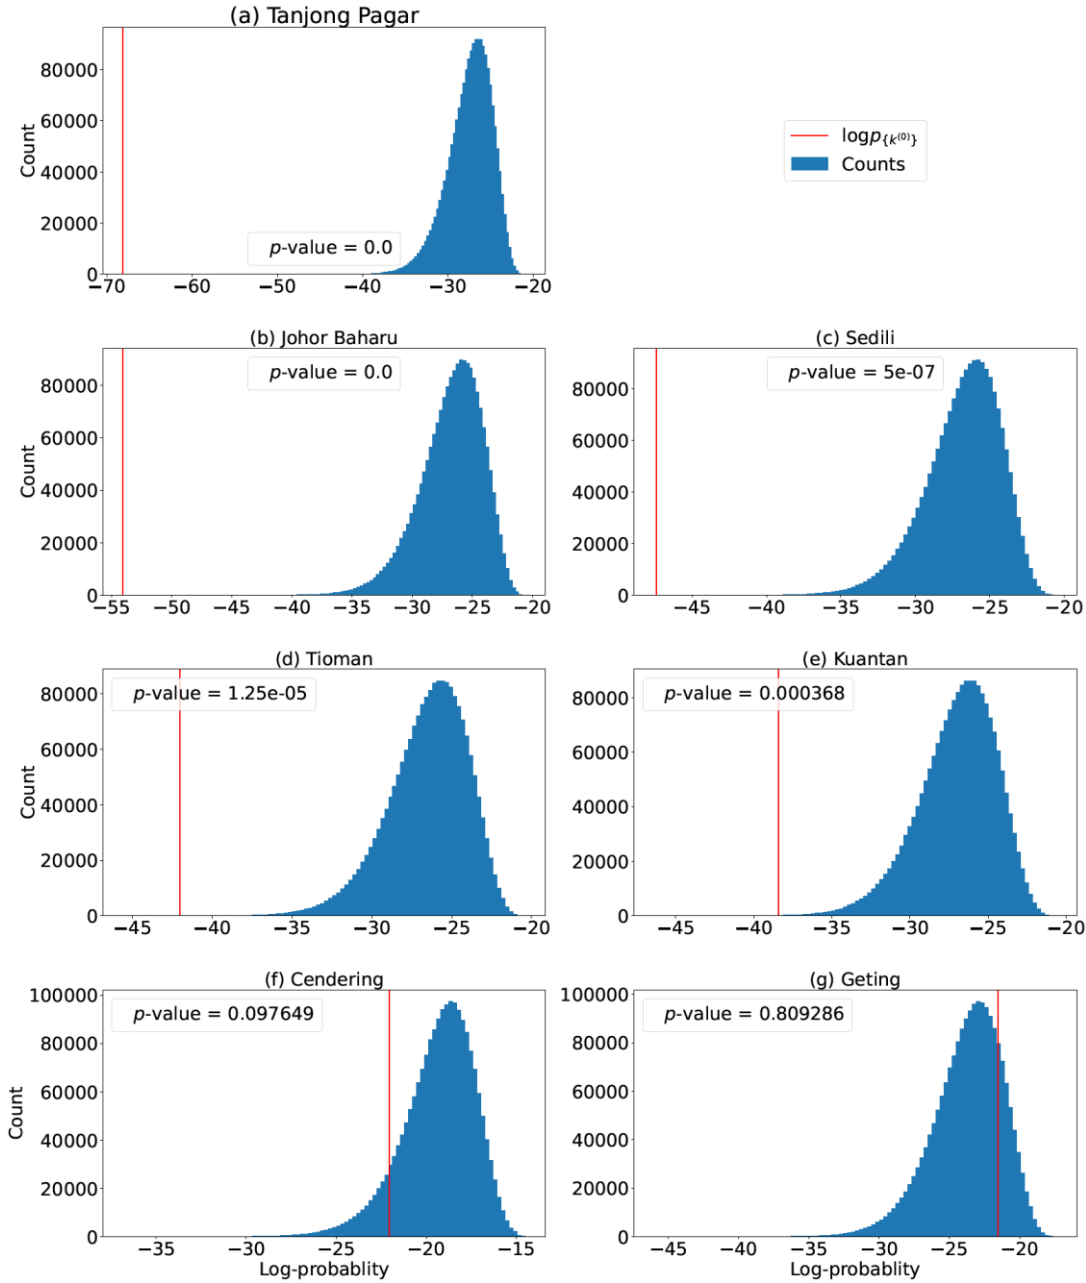

103

104 **Figure S15: Histogram of 1,000,000 log-probabilities of obtaining a randomly generated bootstrap sample from the normalized No-**  
 105 **TSI distribution  $p_h$  of  $R_{\text{sum}}$  during semidiurnal tidal cycles. Red vertical lines indicate  $\log p_{\{k^{(0)}\}}$ , the log-probabilities of obtaining**  
 106 **the frequency distribution  $k^{(0)}$  from  $p_h$ .  $p$ -values are obtained by taking the quantile of the  $\log p_{\{k^{(0)}\}}$  within the 1,000,000 log-**  
 107 **probabilities of bootstrap samples.**

108



Number of  $R_{phase}$  extremes found at x hours from nearest tidal high water

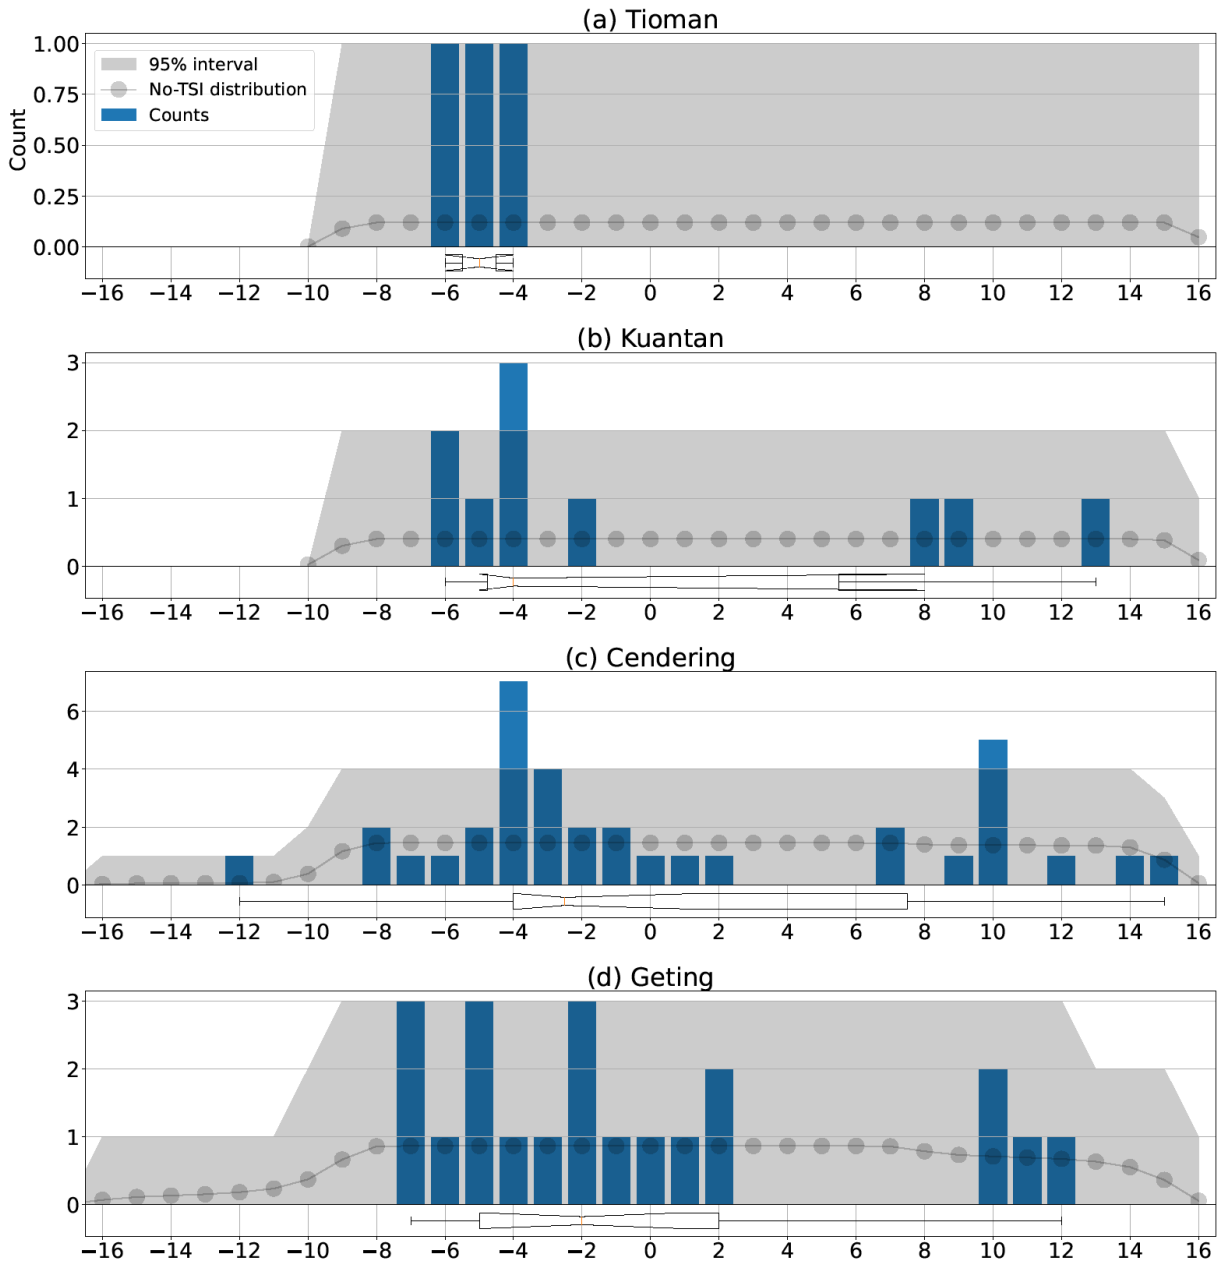

109

110 **Figure S16: The frequency distribution for extreme values of  $R_{sum}$  and the No-TSI distribution during diurnal tidal cycles, truncated**  
 111 **at  $\pm 16$  hours from tidal high water. The frequency distribution is compared to the No-TSI distribution to determine the presence**  
 112 **of tide-surge interaction. Summary statistics of the frequency distribution are shown using the horizontal notched box plot, where**  
 113 **orange lines indicate the medians, notches indicate the 95% confidence interval of the medians, notched rectangles indicate the**  
 114 **interquartile range (IQR), whiskers indicate a range that extends up to  $1.5 \times IQR$  from the limits of the IQR, and black circles (if**  
 115 **present) indicate outliers outside this range.**

116

## Distribution of bootstrap sample log-probability

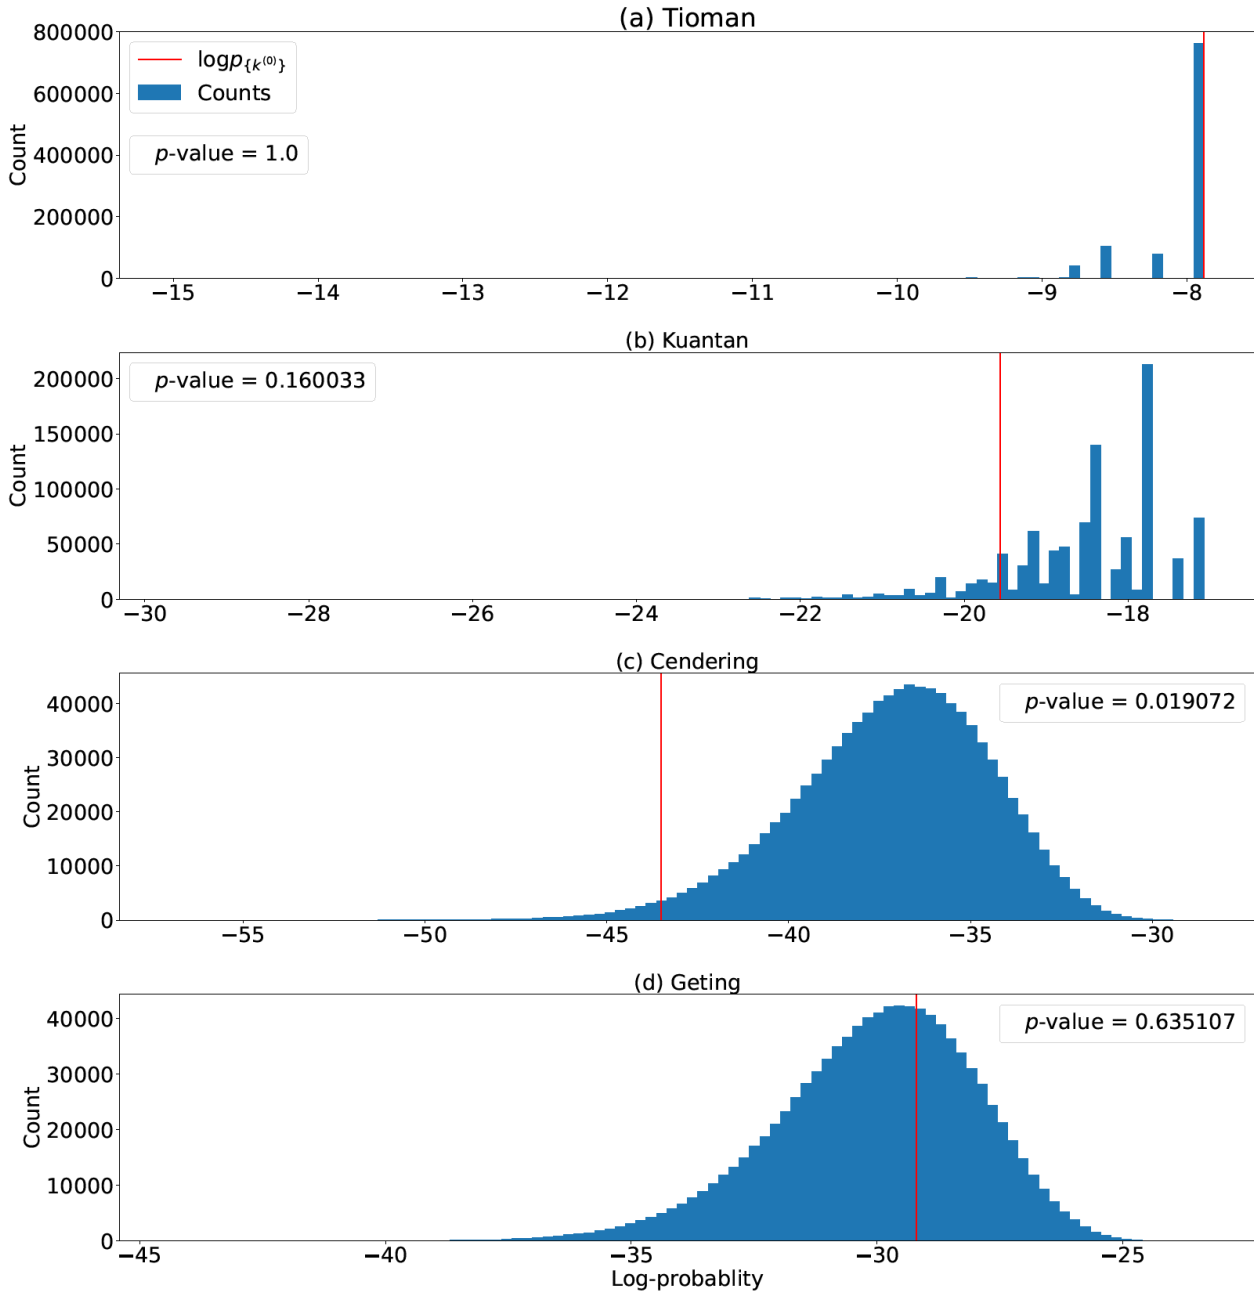

117

118 **Figure S17: Histogram of 1,000,000 log-probabilities of obtaining a randomly generated bootstrap sample from the normalized No-**  
 119 **TSI distribution  $p_h$  of  $R_{\text{sum}}$  during diurnal tidal cycles. Red vertical lines indicate  $\log p_{\{k^{(0)}\}}$ , the log-probabilities of obtaining the**  
 120 **frequency distribution  $k^{(0)}$  from  $p_h$ .  $p$ -values are obtained by taking the quantile of the  $\log p_{\{k^{(0)}\}}$  within the 1,000,000 log-**  
 121 **probabilities of bootstrap samples.**

122

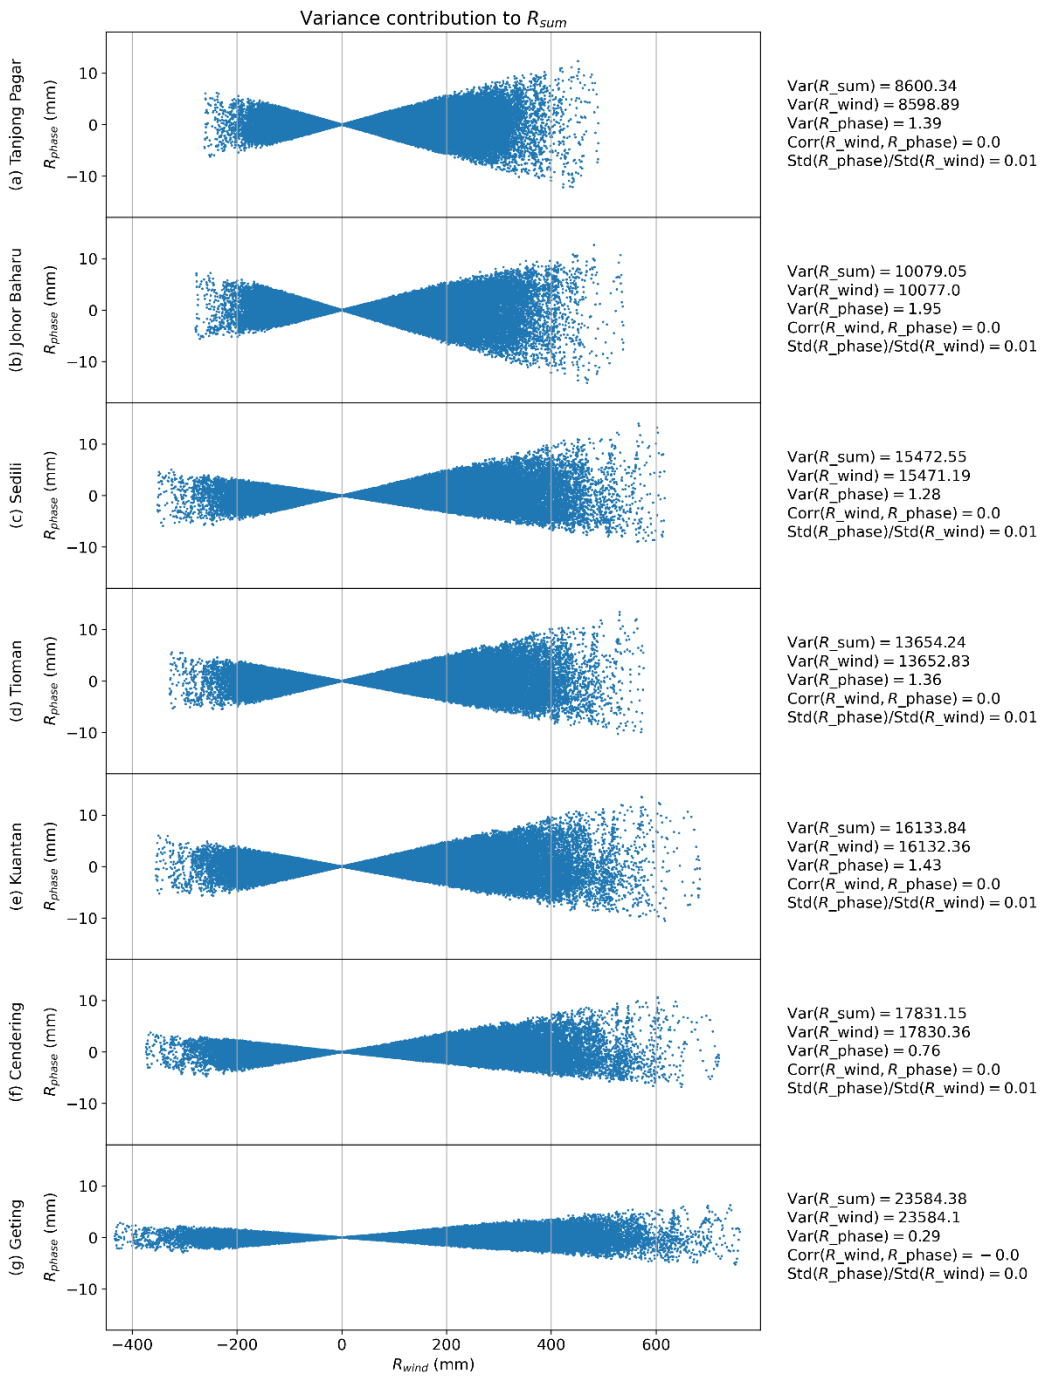

123

124 **Figure S18: Scatter plots between  $R_{wind}$  and  $R_{phase}$  at each tide gauge location and how they contribute to  $R_{sum}$ . Values of  $-0.0$  is**  
 125 **a small negative value below  $-0.05$ .**

126
